# Supplementary material
Source: PubMed Central journal article supplement (PMC1413876)
Supplement: pnas_0507749103_3.pdf [file pnas_0507749103_3.pdf]

**Table 2. Bacterial strains and plasmids**

| Strains/plasmids             | Description                                                                                                                                           | Origin/<br>reference |
|------------------------------|-------------------------------------------------------------------------------------------------------------------------------------------------------|----------------------|
| <i>E. coli</i> K12           |                                                                                                                                                       |                      |
| CC118                        | F <sup>-</sup> Δ( <i>ara-leu</i> )7697 Δ( <i>lacZ</i> )74 Δ( <i>phoA</i> )20 <i>araD139</i><br><i>galE galK thi rpsE rpoB arfE<sup>am</sup> recA1</i> | 1                    |
| <i>Y. pseudotuberculosis</i> |                                                                                                                                                       |                      |
| YPIII                        | pIB1, wild-type                                                                                                                                       | 2                    |
| YP31                         | pIB1 <sup>-</sup> , <i>inv::Tn10</i>                                                                                                                  | 3                    |
| YP45                         | pIB1, <i>yadA</i> <sup>+</sup>                                                                                                                        | This work            |
| YP46                         | pIB1, <i>yadA</i> Δ53-83                                                                                                                              | This work            |
| YP47                         | pIB1, <i>yadA</i> <sup>-</sup>                                                                                                                        | 3                    |
| <b>Plasmids</b>              |                                                                                                                                                       |                      |
| pBAD18                       | cloning vector, p <sub>BAD</sub> , Ap <sup>R</sup>                                                                                                    | 4                    |
| pGP704                       | R6K based suicide vector, Ap <sup>R</sup>                                                                                                             | 5                    |
| pJE13                        | pBAD18, <i>yadA<sub>ent</sub></i> <sup>+</sup> , Ap <sup>R</sup>                                                                                      | This work            |
| pPD284                       | pBAD18, <i>yadA<sub>pstb</sub></i> <sup>+</sup> , Ap <sup>R</sup>                                                                                     | 3                    |
| pTH1                         | pBAD18, <i>yadA<sub>pstb</sub></i> Δ(53-83), Ap <sup>R</sup>                                                                                          | This work            |
| pTH2                         | pBAD18, <i>yadA<sub>pstb</sub></i> (K59A), Ap <sup>R</sup>                                                                                            | This work            |
| pTH6                         | pBAD18, <i>yadA<sub>pstb</sub></i> (A58E), Ap <sup>R</sup>                                                                                            | This work            |
| pTH22                        | pBAD18, <i>yadA<sub>pstb</sub></i> (Δ53-67), Ap <sup>R</sup>                                                                                          | This work            |
| pTH24                        | pBAD18, <i>yadA<sub>pstb</sub></i> (Δ68-83), Ap <sup>R</sup>                                                                                          | This work            |
| pTH25                        | pBAD18, <i>yadA<sub>pstb</sub></i> (V133D,N134A), Ap <sup>R</sup>                                                                                     | This work            |
| pTH26                        | pBAD18, <i>yadA<sub>pstb</sub></i> (V133D,N134A,Δ53-83), Ap <sup>R</sup>                                                                              | This work            |

1. Manoil, C. & Beckwith, J. (1986) *Science* **233**, 1403–1408.
2. Bolin, I., Norlander, L. & Wolf-Watz, H. (1982) *Infect. Immun.* **37**, 506–512.
3. Eitel, J. & Dersch, P. (2002) *Infect. Immun.* **70**, 4880–4891.
4. Guzman, L. M., Belin, D., Carson, M. J. & Beckwith, J. (1995) *J. Bacteriol.* **177**, 4121–4130.
5. Miller, V. L. & Mekalanos, J. J. (1988) *J. Bacteriol.* **170**, 2575–2583.
