# Supplementary material
Source: PubMed Central journal article supplement (PMC1413876)

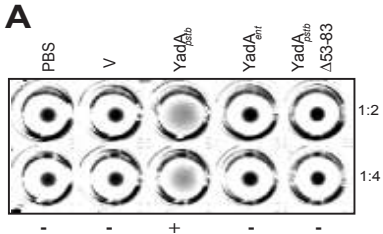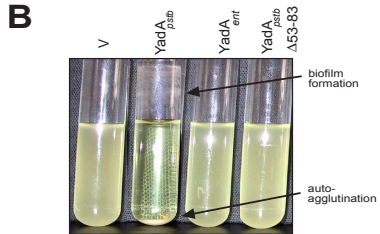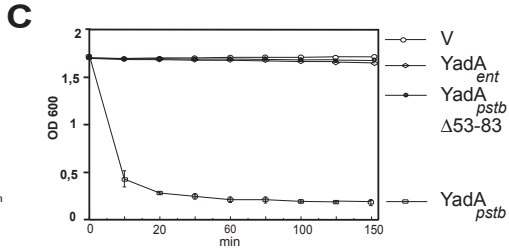

Supplement: pnas_0507749103_2.pdf [file pnas_0507749103_2.pdf]
